# Supplementary material
Source: bioRxiv or medRxiv preprint supplement (https://www.biorxiv.org/highwire/filestream/11086/field_highwire_adjunct_files/2/040659-3.pdf)
Supplement: Supplementary file [file 040659-3.pdf]

# Supporting Information for

## Eco-evolutionary buffering: rapid evolution facilitates regional coexistence of species engaged in local priority effects

4

Meike J. Wittmann and Tadashi Fukami

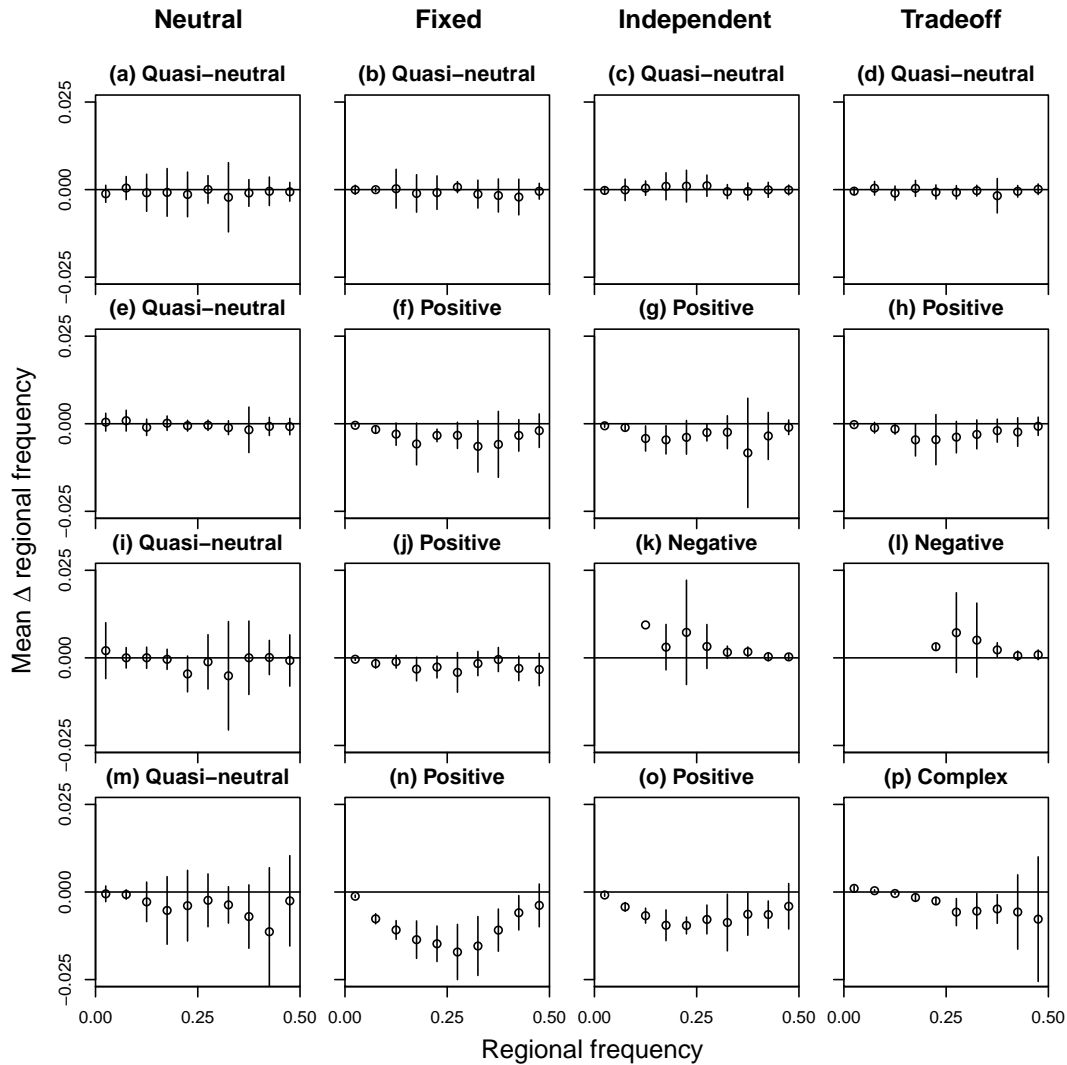

Figure S1: Frequency-dependence plots, i.e. intervals of mean regional frequency change  $\pm 3.83$  standard errors for the various frequency bins between 0 and 0.5, corresponding to the the time series in Fig. 2.

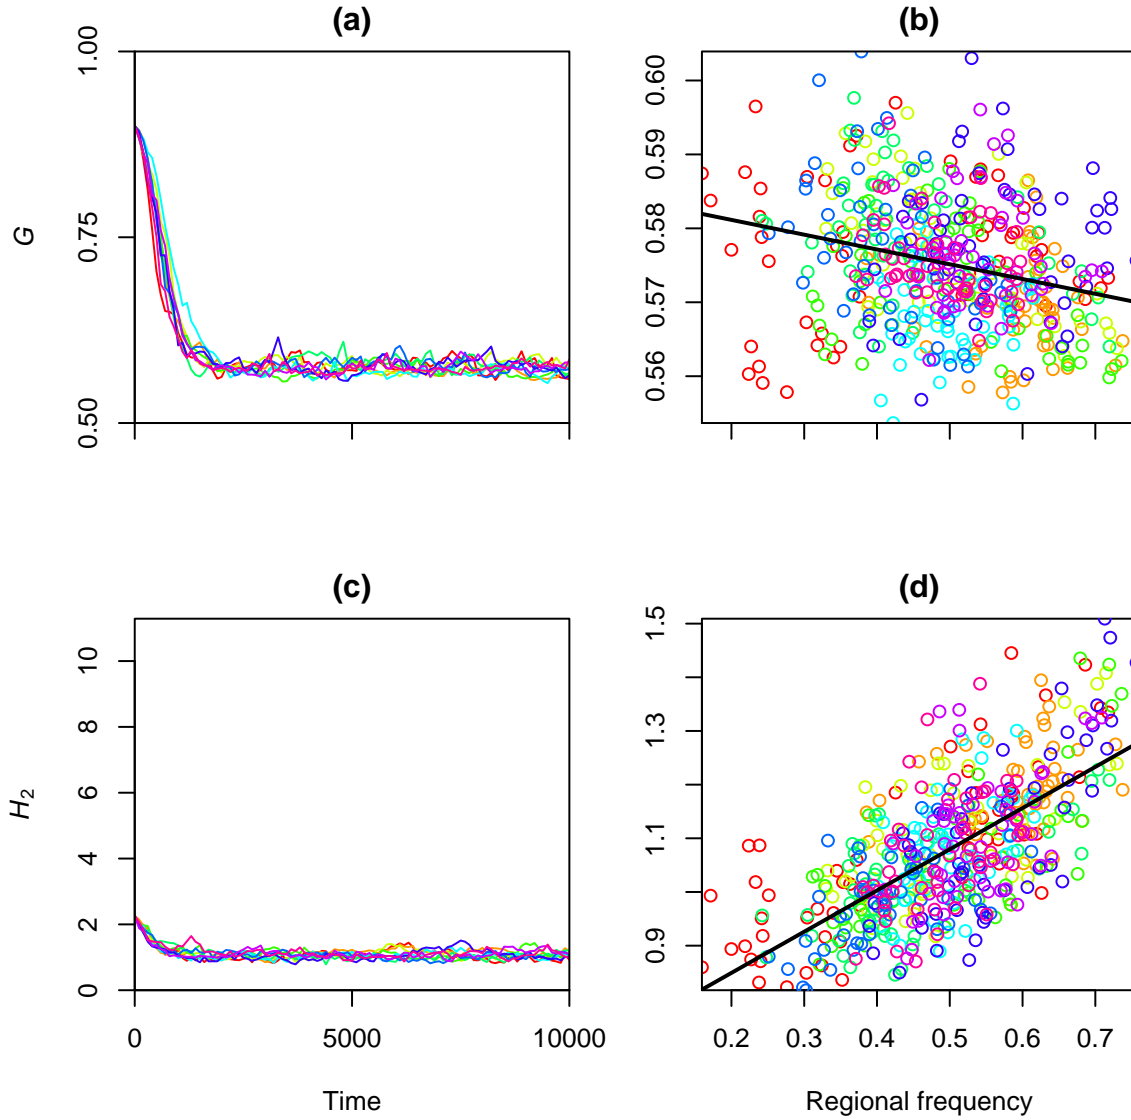

Figure S2: Example illustrating evolutionary dynamics under independent evolution. (a) Average sensitivity to general competition  $G$  for a focal species (species 1). (c) Corresponding average sensitivity to heterospecific interference  $H_2$ . (b) and (d) show how  $G$  and  $H$ , respectively, respond to regional frequency. Parameters as in Fig. 2 1 (negative frequency dependence example).

## Appendix S3 Additional results on parameter sensitivity

6

8 Among the two outcome types that do not allow for stable coexistence, quasi-  
neutrality was more likely under propagule-pool recolonization and small migration  
10 rates, where the early inhabitants of a patch mostly consist of just one species (Fig.  
S3 e,h). Positive frequency dependence was more likely under migrant-pool recolo-  
nization and large migration rates, where the early inhabitants of a patch are a more  
12 representative sample from the whole metacommunity (Fig. S3 e,h). This makes in-  
tuitive sense because in the first case species recolonize patches in proportion to their  
14 regional frequencies, whereas in the second case the regionally common species wins  
disproportionately more often.

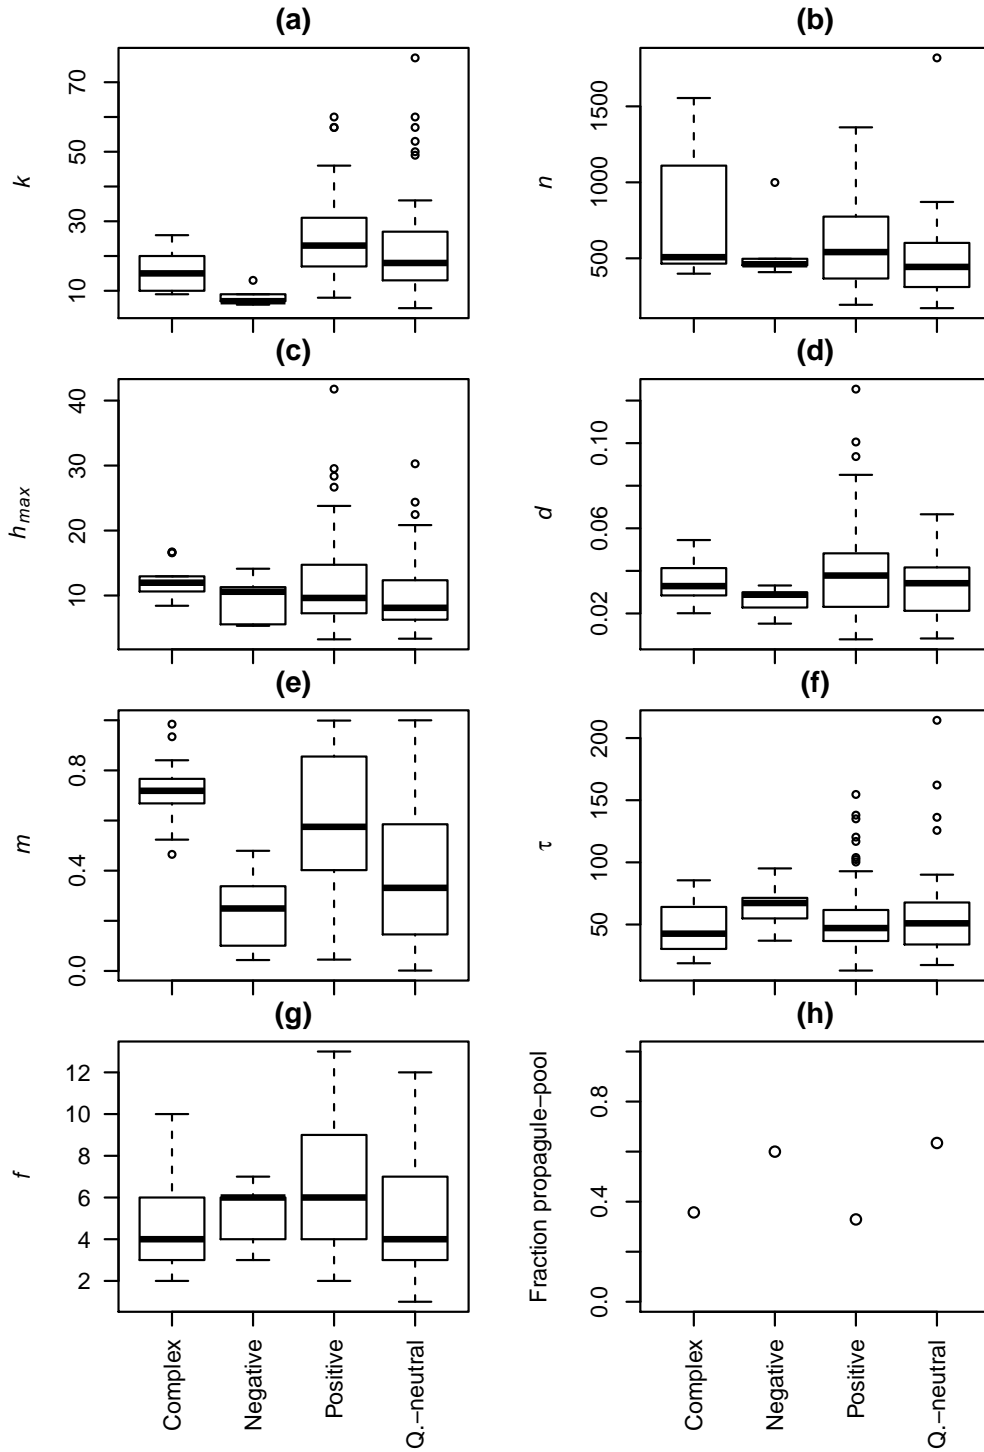

Figure S3: Distribution of parameter values for trade-off simulations classified as having complex, negative, or positive frequency dependence, or quasi-neutrality. Since it is a binary parameter whether recolonization happens according to the propagule-pool or migrant-pool model, (h) shows the fraction of simulations in each class that follow the propagule-pool model.

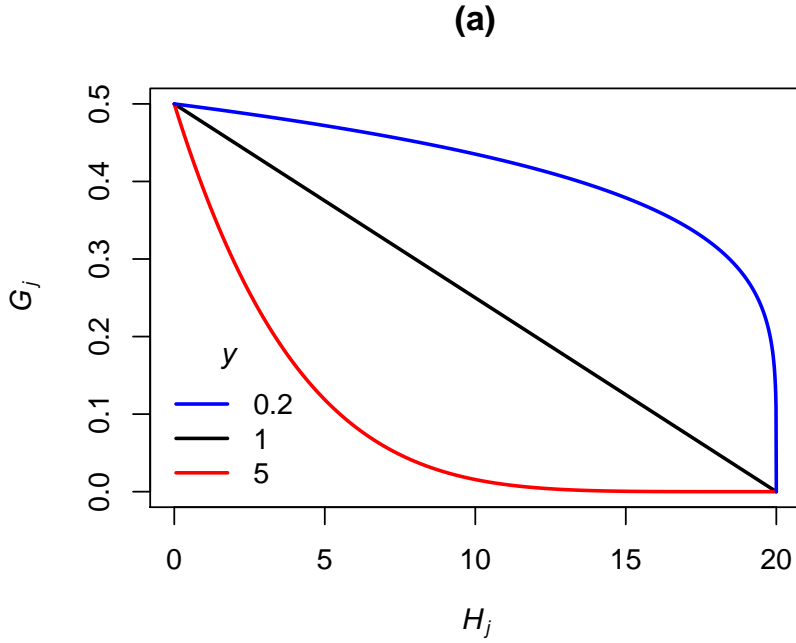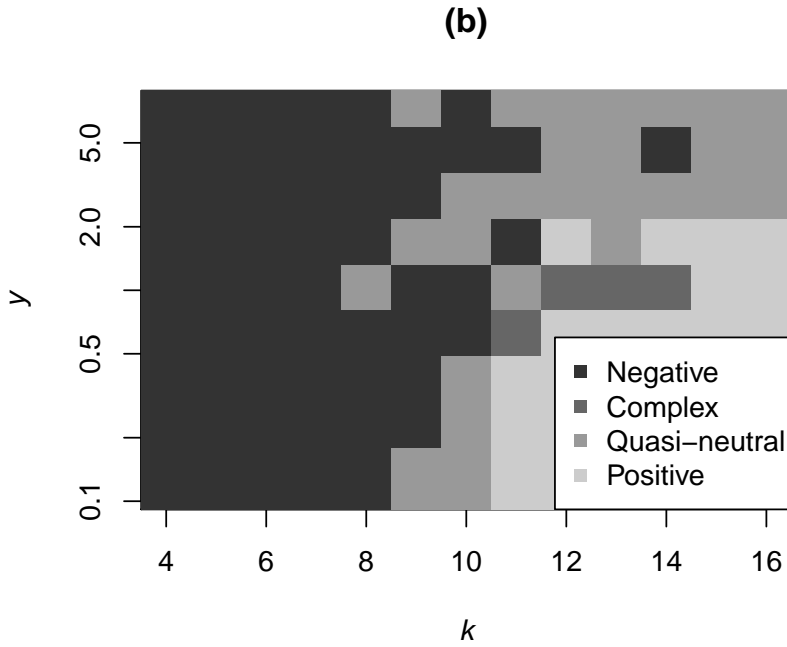

Figure S4: Role of the trade-off shape parameter  $y$  (see 2). (a) The trade-off is concave for  $y < 1$ , linear for  $y = 1$ , and convex for  $y > 1$ . (b) Classification of parameter combinations with various values of  $y$  and local community size  $k$ . All other parameters are held constant at the values from Fig. 2 1. Note the log-scale on the  $y$  axis.

## 16 **Appendix S4 Additional results for more than two** 20 **species**

18 Here we consider metacommunities of more than two species under a parameter  
combination that exhibited complex frequency dependence with two species (last  
20 row in Fig. 2). As in the negative frequency dependence example in Fig. 6, meta-  
communities starting with three species generally maintained all three species until  
22 the end. Metacommunities starting with four or five species maintained four species  
(Fig. S5). However, metacommunities starting with ten species often had only one  
24 or two species left at the end. To better understand this result, we performed two  
additional types of control simulation. In the “10-species” control, we started the  
26 metacommunity with only two species, but individuals had sensitivity traits  $H_j$  for  
9 interacting species, as in the 10-species case. The two species in this control gen-  
28 erally did not coexist until the end of the simulation (Fig. S5). In the “plasmid”  
control, we made the loci corresponding to extinct species no longer contribute to  
30 the overall competitive pressure. Qualitatively, this scenario represents a situation  
where the relevant loci are on plasmids that can be rapidly discarded once they are  
32 no longer advantageous. With this modification, metacommunities starting at ten  
species stabilized at four species (Fig. S5). These additional results indicate that  
34 it is mutational noise at sensitivity traits affecting interactions with extinct species  
that destabilized coexistence in the original model.

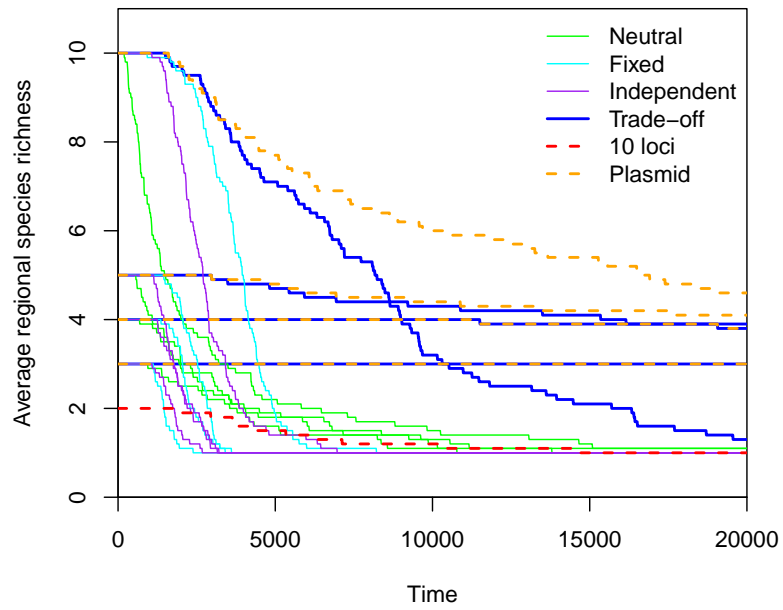

Figure S5: Time series of regional species diversity (gamma diversity) for different initial numbers of species. Each point is the average over 10 replicate simulations. Parameters are the same as in the last row in Fig. 2.

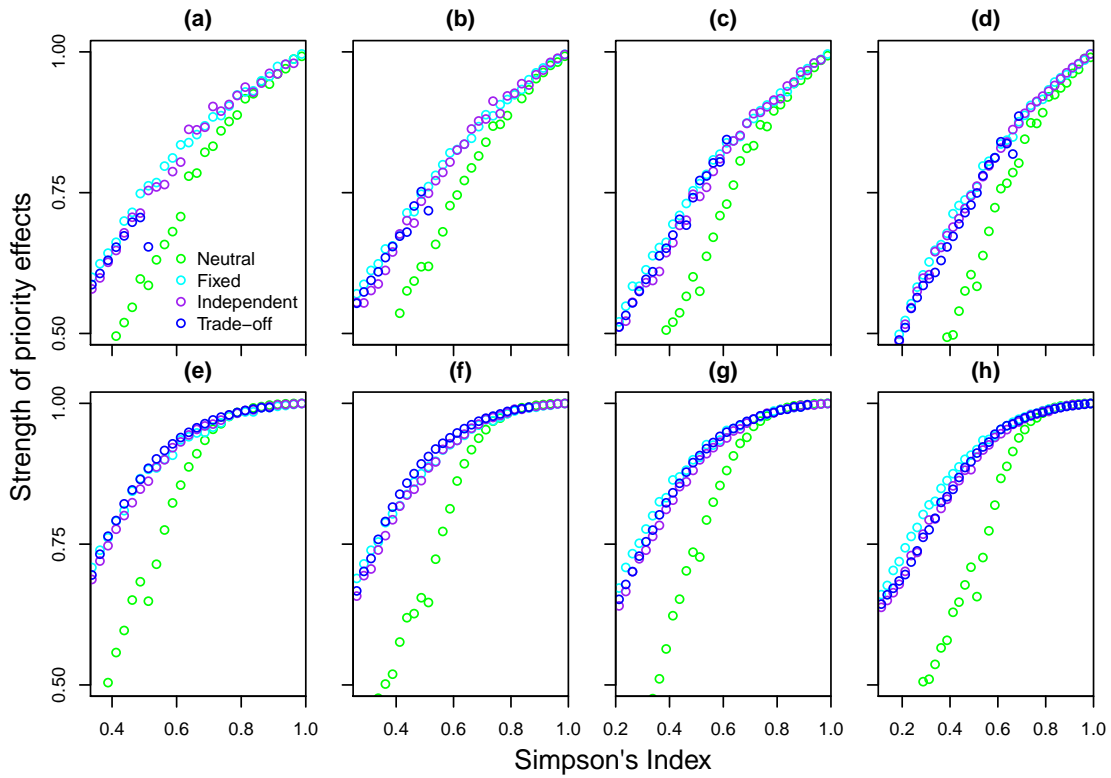

Figure S6: Strength of priority effects in the multi-species simulations. The first and second row correspond to Figs. 6 and S5, respectively. There are 3 species in the first column, four species in the second column, five species in the third column, and ten species in the fourth column.



## 36 **Appendix S5 Additional analysis on regional co-** 37 **existence**

38 In the following two sections, we will show that (1) in metacommunities with small  
39 local communities and a low migration rate, the regionally rare species tends to be  
40 “subjectively” common locally, and (2) the more common a rare species is locally,  
41 the smaller is the difference in trait values between regionally common and rare  
42 species for the average member of the rare species to be at an advantage in its local  
43 environment. The reason is that individuals do not suffer as much from heterospecific  
44 interference if they are locally common. From these two points, we can conclude that  
45 with small community sizes and with small migration rates, a smaller difference in  
46 trait values is sufficient to tip the balance towards the regionally rare species. Thus  
47 negative regional frequency dependence is more likely under smaller local community  
48 sizes and lower migration rates.

### 1. “Subjective” local frequency

50 Consider a metacommunity where all patches have the same total community size  
51  $k$ , as we assume in our simulations. The mean local frequency of a species averaged  
52 over all patches is equal to its regional frequency. However, the mean local frequency  
53 might not adequately portray the community composition experienced by the average  
54 individual of the focal species. For example, consider a metacommunity with a local  
55 community size of 10 and a focal species at a regional frequency of 0.1. Let us also  
56 imagine that most patches are dominated by a single species as a result of local  
57 priority effects and that only a small fraction of patches contains both species. In  
58 this scenario, the negative effects of interference by the common species will only  
59 be felt by a small fraction of individuals of the rare species. Had we assumed that  
60 most local frequencies are close to the regional frequency, we would have erroneously  
61 concluded that most members of the rare species are in patches where the other  
62 species is locally common and that they would therefore suffer strongly from the  
63 negative effects of interference by the other species.

64 To formalize this intuition, we define the “subjective” local population size of a  
65 focal species as the local population size experienced by the average individual of  
66 this species

$$\mathbf{E}[N^*] := \frac{\sum_{i=1}^k i^2 \pi(i)}{\sum_{i=1}^k i \pi(i)}, \quad (\text{S1})$$

where  $\pi(i)$  is the proportion of patches containing  $i$  individuals of the focal species. In  
 68 other words, when computing the average, patches are weighed by the local popula-  
 tion size of the focal species. This way of averaging is formally known as size-biasing.

70 The mean subjective local population size can be easily computed from the mean  
 and variance across patches of local population sizes  $N$ :

$$\mathbf{E}[N^*] = \frac{\mathbf{E}[N^2]}{\mathbf{E}[N]} = \frac{\mathbf{E}[N]^2 + \mathbf{Var}[N]}{\mathbf{E}[N]} = \mathbf{E}[N] + \frac{\mathbf{Var}[N]}{\mathbf{E}[N]}. \quad (\text{S2})$$

72 As (S2) shows, the difference between size-biased expectation and un-biased ex-  
 pectation increases with the variance in local community sizes. Intuitively, the larger  
 74 variance in local community sizes, the more heavily are patches dominated by a single  
 species, and the larger is the subjective local population size of the own species. To  
 76 consider a specific example, let us assume that local population sizes are binomially  
 distributed with parameters  $p$  and  $k$ . We then obtain

$$\mathbf{E}[N^*] = pk + 1 - p \quad (\text{S3})$$

78 and the subjective local frequency is

$$p^* = p + \frac{1 - p}{k}. \quad (\text{S4})$$

The smaller the local community size  $k$  is, the larger is the subjective local frequency  
 80 for a given regional frequency (Fig. S7 a). The increase in subjective local frequency  
 compared to the regional frequency in small patches can be substantial, especially  
 82 for small regional frequencies.

More generally

$$p^* = \frac{\mathbf{E}[N^*]}{k} = p + \frac{\mathbf{Var}[N]}{k^2 p}. \quad (\text{S5})$$

84 Therefore, the average subjective frequency is a decreasing function of local commu-  
 nity size not only for the binomial distribution but whenever  $\mathbf{Var}[N]$  increases with  
 86  $k$  not faster than  $k^2$ . This appears to be the case in our simulated metacommunities.

For small local communities, the size-biased local frequency was substantially larger  
 88 than the respective regional frequency (Fig. S7 b). As a further intuitive illustration  
 why subjective frequency should increase with  $k$ , note that one is the minimum local  
 90 abundance in which we can find members of the rare species. Thus, the smaller  $k$  is,  
 the larger is the minimum possible local frequency of the rare species. For example, if  
 92  $k = 4$ , the minimum possible local frequency is 0.25. In our simulations, the average

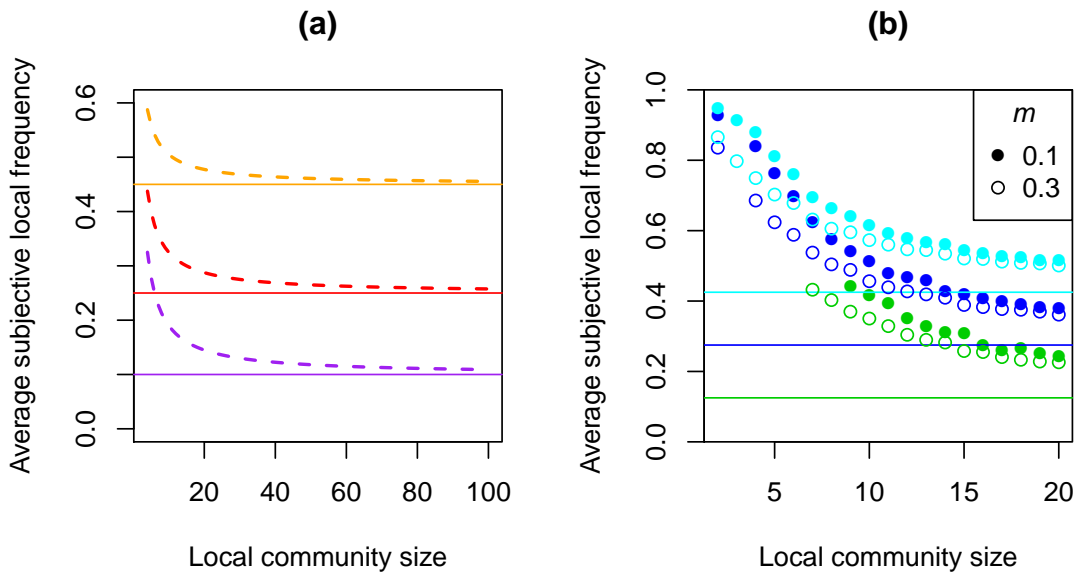

Figure S7: Average subjective frequency as a function of local community size  $k$  for different regional frequencies. As the local community size increases, the average subjective frequency approaches the respective regional frequency (indicated by horizontal lines). In (a) a binomial distribution of local population sizes is assumed, (b) represents distributions of local community sizes from our simulations, specifically those underlying Fig. 5 a.

subjective frequency decreased with migration rate (Fig. S7 b), which makes sense  
 94 because frequent migration reduces variance in local species frequencies.

## 2. Critical evolutionary response

96 Consider a rare species with sensitivity to general competition  $G^r$  and a common  
 species with sensitivity to general competition  $G^c$ , and let  $\Delta G = G^r - G^c$ . The  
 98 common species should evolve to be a better intraspecific competitor or at least be  
 under relaxed selection, so we expect  $\Delta G > 0$ . Assuming a linear trade-off, we will  
 100 now compute the critical value for  $\Delta G$  such that the rare species has an advantage  
 locally when it has  $i$  individuals in a community of size  $k$ , with  $i < k/2$ . Since the  
 102 probability to reproduce is assumed to be the same for all species, a species has an  
 advantage locally when its members have a lower death rate  $C_i = G \cdot k + H(G)(k - N_i)$   
 104 with

$$H(G) = \left(1 - \frac{G - g_{min}}{g_{max}}\right) \cdot h_{max}. \quad (S6)$$

In our study, we used  $g_{min} = 0.5$  and  $g_{max} = 0.5$  so that

$$H(G) = 2(1 - G) \cdot h_{max}. \quad (S7)$$

106 With this, the death rate for rare-species individuals is

$$C^r = G^r k + 2(1 - G^r)h_{max}(k - i) \quad (S8)$$

and the death rate for members of the common species is

$$C^c = G^c k + 2(1 - G^c)h_{max}i = (G^r - \Delta G)k + 2(1 - G^r + \Delta G)h_{max}i. \quad (S9)$$

Members of the rare species have an advantage, i.e. a lower death rate, if

$$G^r(k - 2h_{max}(k - i)) + 2h_{max}(k - i) < (G^r - \Delta G)(k - 2h_{max}i) + 2h_{max}i \quad (S10)$$

$$\Leftrightarrow G^r(-2h_{max}(k - 2i)) + 2h_{max}(k - 2i) < \Delta G(2h_{max}i - k) \quad (S11)$$

$$\Leftrightarrow 2h_{max}(k - 2i)(1 - G^r) < \Delta G(2h_{max}i - k). \quad (S12)$$

108 We need to consider two cases:

a)  $k > 2h_{max}i$ . Since  $i < k/2$ , it follows from (S12) that

$$\Delta G < \frac{2h_{max}(k-2i)(1-G^r)}{2h_{max}i-k} < 0. \quad (\text{S13})$$

110 b)  $k < 2h_{max}i$

$$\Delta G > \frac{2h_{max}(k-2i)(1-G^r)}{2h_{max}i-k} > 0. \quad (\text{S14})$$

112 Since the common species will generally have a lower  $G$  and  $\Delta G > 0$ , (S13) cannot be  
 113 fulfilled. If  $h_{max} < 1$  then  $k > 2h_{max}i$  for all  $i < k/2$ , and it would be impossible for  
 114 a locally rare species to have a local advantage, no matter how sensitive the common  
 115 species is to heterospecific interference. This should prevent regional coexistence.  
 However, in our simulations we did not consider such low values of  $h_{max}$ .

116 In case b), we get a critical trait difference

$$R_{crit} := \frac{2h_{max}(k-2i)(1-G^r)}{2h_{max}i-k} \quad (\text{S15})$$

such that a globally and locally rare species has a local advantage whenever the  
 118 difference in  $G$  values is at least  $R_{crit}$ . The smaller  $R_{crit}$  is, the easier it is for evolution  
 along the trade-off to stabilize regional coexistence.

120 The critical trait difference is a function of local population size  $i$  and

$$\frac{\partial R_{crit}}{\partial i} = 2h_{max}(1-G^r) \frac{-2(2h_{max}i-k) - (k-2i)2h_{max}}{(2h_{max}i-k)^2} = \frac{4(1-G^r)kh_{max}(1-h_{max})}{(2h_{max}i-k)^2}. \quad (\text{S16})$$

If  $h_{max} > 1$ , which is the case if the condition of case b) is fulfilled and  $k > 1$ ,  
 122 then the critical evolutionary response necessary to give an advantage to the rare  
 species decreases with its local population size  $i$ . As explained in the main text and  
 124 illustrated in Fig. S8, this can give an average advantage to the rare species while  
 at the same time priority effects are maintained, but slightly asymmetric. However,  
 126 not all values of  $k$  have the same potential for such slight asymmetry. For odd  $k$ , for  
 example, there are no patches with a completely balanced species composition and to  
 128 start having a regional advantage the regionally rare species needs to dominate even  
 in patches where the regionally common species is slightly more abundant, which  
 130 presumably requires a larger evolutionary response. Such “discreteness effects” may  
 underlie the idiosyncratic relationship between  $k$  and outcome type in Fig. 5 a.

$$\frac{\partial R_{crit}}{\partial h_{max}} = 2(k - 2i)(1 - G^r) \frac{2h_{max}i - k - 2h_{max}i}{(2h_{max}i - k)^2} = \frac{-2k(k - 2i)(1 - G^r)}{(2h_{max}i - k)^2} < 0. \quad (\text{S17})$$

132 Therefore, with increasing  $h_{max}$  the evolutionary response necessary to provide an  
 advantage to the regionally rare species decreases. This is consistent with the finding  
 134 in Fig. 5 g: regional negative frequency dependence occurred only for sufficiently large  
 $h_{max}$ . Under a high  $h_{max}$ , the common species is punished heavily for neglecting to  
 136 invest in heterospecific tolerance.

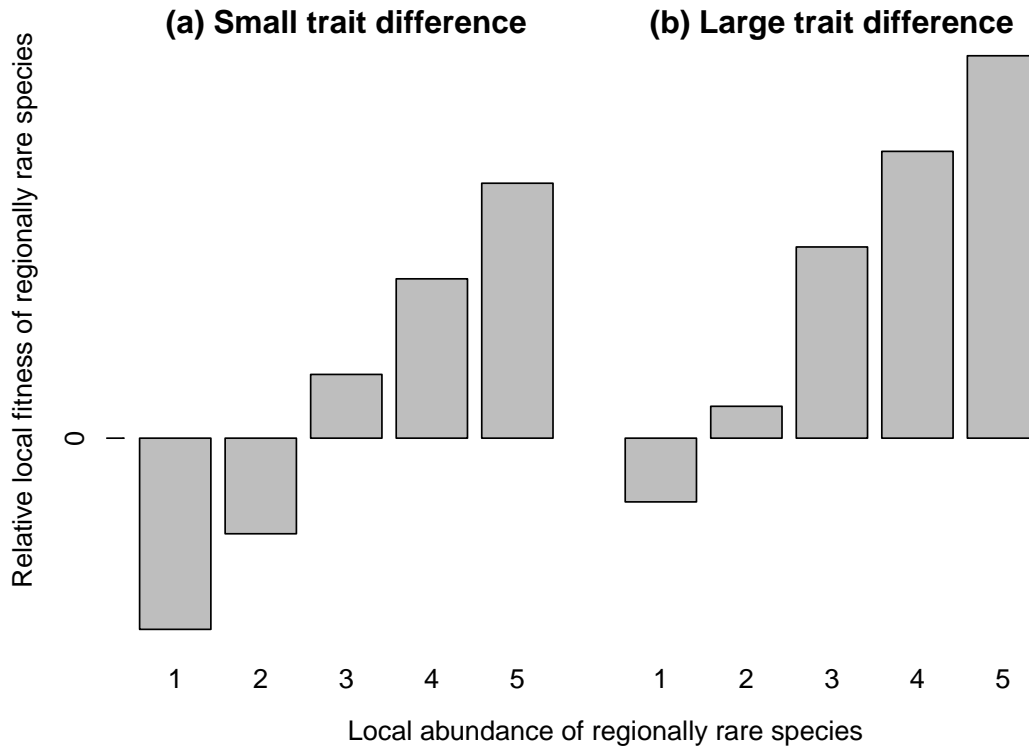

Figure S8: Cartoon illustrating a situation with priority effects at extremely unbalanced local species configurations and an advantage of the regionally rare species under more balanced configurations. The local community size  $k$  is 6. (a) Small evolutionary response,  $\Delta G$ . (b) Large evolutionary response,  $\Delta G$ .
